# Supplementary material for: Unusual Endolymphatic Sac Tumor: Case Report and Literature Review
Source: Research Square preprint supplement (doi:10.21203/rs.3.rs-8264102/v1), 2026-01-30
Supplement: Supplementary file 1 [file 8b7be6088a9a03e3e8fcae8f.docx]

**CARE Checklist –: Case Reports**

| **Item** | **Topic** | **Checklist item description** | **Line/page** |
| --- | --- | --- | --- |
| 1 | **Title** | **Unusual Endolymphatic Sac Tumor: Case Report and Literature Review** | 01/01 |
| 2 | **Keywords** | **Keywords:**  Endolymphatic sac tumor; Temporal bone tumor; Facial nerve palsy; Hearing loss; Skull base surgery; Case report; Neurotology, case report | 10/01 |
| 3a | **Abstract** | **Background:** Endolymphatic sac tumors (ELSTs) are uncommon low-grade tumors with highly local aggressive features. These tumors could be associated with Von Hippel-Lindau disease or isolated. These tumors mostly present with audiovestibular and neurological symptoms. The definitive diagnosis can be achieved through histopathological examination of the post-surgical excised specimen. | 02/01 |
| 3b | **Case Presentation:** A 42-year-old female who was previously healthy presented to the neurology department with a primary complaint of headache, mainly migraine, accompanied by nausea and vomiting. Additionally, she reported slowly progressive left facial weakness. During the neurological examination, there was a grade VI House-Brackmann facial nerve paralysis. At that time, there was also a progression of hearing loss; therefore, referred to neurotology and the lateral skull base clinic.  During her first evaluation at the neurotology and lateral skull base clinic. The patient reported there was a left ear reduction in hearing sense with intermittent bloody ear discharge. A comprehensive ear, nose, throat, larynx, and head and neck examination revealed only granulation tissue protruding from the left tympanic membrane and mixed with purulent discharge, with complete (grade VI) facial nerve palsy. A clinical hearing assessment showed a negative Rinne’s test and lateralization to the right ear during the Weber’s test, which was consistent with SNHL type.  A pure tone audiometry was requested to quantify the hearing loss level and to confirm the hearing loss type. PTA results showed profound SNHL in the left ear with a normal hearing level in the right ear. Additionally, tympanometry showed bilateral type A curves.  Based on these clinical findings, imaging modalities such as a CT scan and MRI were warranted for further evaluation. A CT scan of the temporal bone, as shown in [Figure 1], demonstrates features suggestive of a neoplastic process involving the petrous part of the left temporal bone. Following the CT Scan findings, a further MRI with Gadolinium contrast was obtained for better visualization of the lesion. The study revealed findings suggestive of a left-sided endolymphatic sac tumor infiltrating the internal auditory canal, involving the vestibulocochlear nerve (CN VIII) and the tympanic segment of the facial nerve (CN VII), as well as the interosseous component of the glossopharyngeal nerve (CN IX), as shown in [Figure 2]. | 25/02 |
| 3c | **Conclusion:** In conclusion, endolymphatic sac tumors are rare with local aggressive behavior. In our reporting case, the patient initially presented to the neurology department and was subsequently referred to us, where the diagnosis was established. Intraoperatively, the mass exhibited an atypical spongiform appearance with associated bony fragments. The excised mass was sent for histopathological examination, which confirmed the diagnosis of endolymphatic sac tumor. | 35/10 |
| 4 | **Introduction/background** | The current standard of care and contributions of this case—with references (1-2 paragraphs) |  |
| 5 | **Timeline** | Information from this case report organized into a timeline (table or figure) |  |
| 6a | **Patient Information** | A 42-year-old female who was previously healthy | 25/02 |
| 6b | Facial nerve paralysis, hearing loss and headache | 26/02 |
| 6c | the patient underwent surgical resection of the tumor via a transmastoid-translabyrinthine approach. ]. Following surgery, the patient was successfully extubated and sent to the intensive care unit (ICU) for observation. She was then sent home in stable condition with a genetic referral for a von Hippel-Lindau (VHL) disease study and follow-up. | 04/04 |
| 7 | **Physical Exam** | A comprehensive ear, nose, throat, larynx, and head and neck examination revealed only granulation tissue protruding from the left tympanic membrane and mixed with purulent discharge, with complete (grade VI) facial nerve palsy. A clinical hearing assessment showed a negative Rinne’s test and lateralization to the right ear during the Weber’s test, which was consistent with SNHL type. | 27/02 |
| 8a | **Diagnostic** | A CT scan of the temporal bone, as shown in [Figure 1], demonstrates features suggestive of a neoplastic process involving the petrous part of the left temporal bone. Following the CT Scan findings, a further MRI with Gadolinium contrast was obtained for better visualization of the lesion. The study revealed findings suggestive of a left-sided endolymphatic sac tumor infiltrating the internal auditory canal, involving the vestibulocochlear nerve (CN VIII) and the tympanic segment of the facial nerve (CN VII), as well as the interosseous component of the glossopharyngeal nerve (CN IX), as shown in [Figure 2]. | 08/03 |
| 8b | **Assessment** | Diagnostic reasoning including other diagnoses considered and challen Based on these clinical findings, imaging modalities such as a CT scan and MRI were warranted for further evaluation. ges | 07/03 |
| 8c | Consider tables or figures linking assessment, diagnoses and interventions |  |
| 8d | Prognostic characteristics where applicable |  |
| 9a | **Interventions** |  |  |
| 9b | the patient underwent surgical resection of the tumor via a transmastoid-translabyrinthine approach. ]. Following surgery, the patient was successfully extubated and sent to the intensive care unit (ICU) for observation. She was then sent home in stable condition with a genetic referral for a von Hippel-Lindau (VHL) disease study and follow-up. | 04/04 |
| 9c | Note changes in intervention with explanation |  |
| 9d | Other concurrent interventions |  |
| 10a | **Follow-up and** | Opd FU |  |
| 10b | **Outcomes** | Important follow-up diagnostic evaluations |  |
| 10c | Assessment of intervention adherence and tolerability, including adverse events |  |
| 11a | **Discussion** | THIS is rare presentation of a rare tumour. Limitation including being case report and late presentation of pateitn with no reports of previyos visits to other hospitals. |  |
| 11b | Specify how this case report informs practice or Clinical Practice Guidelines (CPG) |  |
| 11c | How does this case report suggest a testable hypothesis? |  |
| 11d | Conclusions and rationale |  |
| 12 | **Patient Perspective** | When appropriate include the assessment of the patient or client on this episode of care |  |
| 13 | **Informed Consent** | Uploaded with the manuscript and other files |  |
| 14 | **Additional Information** | Acknowledgement section; Competing Interests (Conflict of Interests statement); IRB approval, (Ethical Committee Approval) when required |  |

**Summary of the case**

| 1 | **Patient (gender, age)** | 42 female |
| --- | --- | --- |
| 2 | **Final Diagnosis** | Endolymphatic sac tumour |
| 3 | **Symptoms** | Hearing loss, facial paralysis headach |
| 4 | **Medications** | Iv antibiotics, analgesia, steroids , enoxaparin |
| 5 | **Clinical Procedure** | surgical resection of the tumor via a transmastoid-translabyrinthine approach |
| 6 | **Specialty** | Ent |
